# Supplementary material for: Association of cardiac rehabilitation and health-related quality of life following acute myocardial infarction
Source: Heart. 2020 Aug 21;106(22):1726–31. doi: 10.1136/heartjnl-2020-316920 (PMC7656151; doi:10.1136/heartjnl-2020-316920)
Supplement: Supplementary data [file heartjnl-2020-316920supp001.pdf]

## Supplementary Material

**Title:** Association of cardiac rehabilitation and health-related quality of life following acute myocardial infarction.

**Authors:** Ben Hurdus MBBS, Theresa Munyombwe PhD, Tatendashe B. Dondo PhD, Suleman Aktaa MD, Gerard Oliver, Marlous Hall PhD, Patrick Doherty PhD, Alistair S Hall PhD FRCP, Chris P. Gale PhD FRCP

**eFigure 1.** Derivation of the analytical cohort from the EMMACE-3 dataset.

**eFigure 2:** Overlap assumption assessment plots (A) and Distribution of propensity scores across treatment and comparison groups (B).

**eTable 1:** Covariate balance across those who attended and those who did not attend cardiac rehabilitation after weighting on the propensity score

**eFigure 3:** ROC curve for the propensity scoring model

**eFigure 4:** Normal probability plot of residuals

**eTable 2:** Imputation strategy

**eTable 3.** Comparison of baseline characteristics between respondent and non-respondents at 12 months.

**eTable 4:** EQ-5D-3L domain responses for patients with AMI at hospitalization, 30 days, 6 months and 12 months

**eTable 5.** Mean EQ-5D-3L and EQ-VAS scores at baseline, 30 days, 6 months and 12 months

**eTable 6.** HRQoL utilities dependent on attendance of cardiac rehabilitation and self-reported physical activity level

**eTable 7:** Results from the imputed and propensity score weighted multi-level modelling of association of cardiac rehabilitation on change in EQ-VAS following AMI

## **eReferences**

**eFigure 1:** Derivation of the analytical cohort from the EMMACE-3 dataset.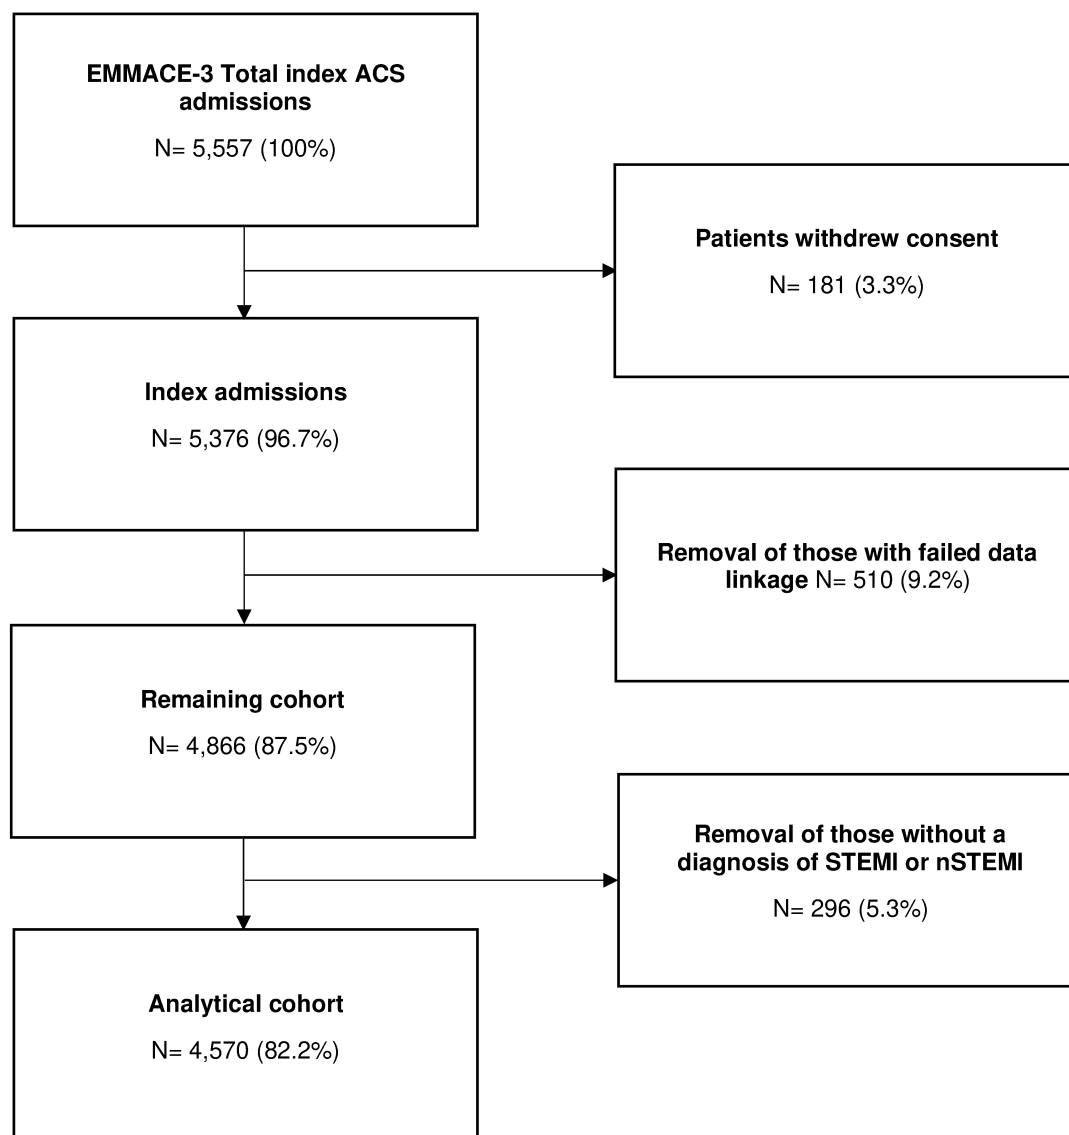

## Supplementary Methods

### Section 1

#### Propensity score analysis

A non-parsimonious multivariable logistic regression model was used for the treatment assignment model to derive propensity scores (PS) (probability of attending cardiac rehabilitation at 30 days, conditional on observed patient baseline covariates) to weight the data. The model was adjusted for patient baseline characteristics; demographics (age, sex, body mass index, ethnicity, index of multiple deprivation [IMD]), cardiovascular risk factors (diabetes, hypercholesterolaemia, hypertension, smoking status, COPD, family history of CHD), cardiovascular history (cerebrovascular disease, peripheral vascular disease, previous angina, previous AMI, previous PCI, previous CABG), discharge medications (statins, aspirin, P2Y<sub>12</sub> inhibitors, angiotensin converting enzyme inhibitors [ACEi]/angiotensin receptor blockers [ARB]), coronary intervention, final diagnosis, re-infarction during index admission, baseline EQ-VAS and self-reported physical activity at 30 days. In order to assess whether the weights constructed from the treatment assignment model balanced the covariates between those who attended and those who did not attend cardiac rehabilitation, standardised differences were derived, a perfectly balanced covariate has a standardised difference of zero. Violation of the overlap assumption was assessed using an overlap plot and by summarising the estimated probabilities of treatment assignment. Observations with estimated propensity scores outside the pre-specified range 0.1 to 0.9 were discarded [1] as including these observations would have resulted in violation of the second assumption of the propensity modelling which requires estimated propensity scores for all observations to be greater than zero and less than one to assume unconfoundedness using propensity score analysis. Eighty nine patients were excluded because they had propensity scores outside the

pre-specified range 0.1 to 0.9. eFigure 2 illustrates the results of the assessment of the overlap assumption and shows that the minimum propensity score for each treatment level was sufficiently greater than zero and that the maximum propensity score for each treatment level was sufficiently less than 1, thus the assumption was not violated. The balance check results are summarised in eTable 1, which shows that the standardised differences for variables in the weighted data were close to zero. The diagnostic assessments suggest that weighting by the inverse probability of treatment created a sample in which the distributions of the covariates were similar between those who attended and those who did not attend cardiac rehabilitation. However, the area under the curve for the propensity score model was 0.64 (eFigure 3), which indicates moderate discrimination for the model.

**eFigure 2:** Overlap assumption assessment plots (A) and distribution of propensity scores across comparison groups (B): those who attended cardiac rehabilitation vs those who did not attend cardiac rehabilitation

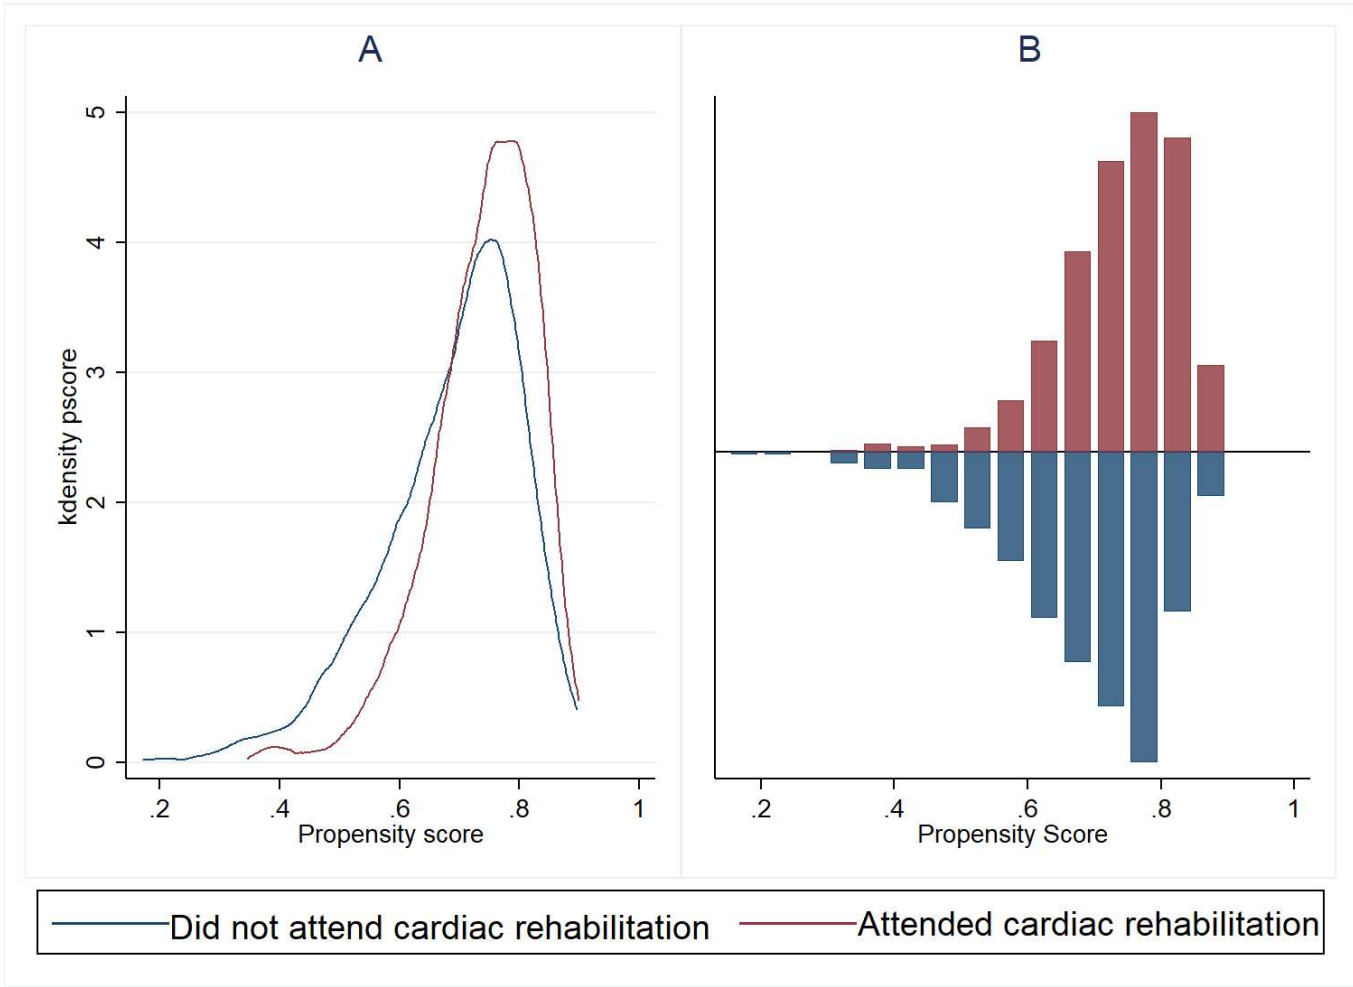

**eTable 1:** Covariate balance across comparison groups after weighting on the propensity score: those who attended cardiac rehabilitation vs those who did not attend cardiac rehabilitation

| Variable                                      | Mean in those who attended cardiac rehabilitation | Mean in those who did not attend cardiac rehabilitation | Standardized difference |
|-----------------------------------------------|---------------------------------------------------|---------------------------------------------------------|-------------------------|
| EQ-VAS on admission                           | 64.03                                             | 64.83                                                   | -0.041                  |
| Age                                           | 63.76                                             | 62.75                                                   | 0.087                   |
| Deprivation (IMD score)                       | 21.29                                             | 25.52                                                   | -0.276                  |
| BMI                                           | 28.19                                             | 28.73                                                   | -0.108                  |
| Smoker ever                                   | 0.66                                              | 0.66                                                    | -0.008                  |
| Ethnicity (white vs. other)                   | 0.98                                              | 0.99                                                    | -0.051                  |
| Final diagnosis                               | 0.43                                              | 0.40                                                    | 0.048                   |
| Family history of CHD                         | 0.41                                              | 0.39                                                    | 0.043                   |
| Previous PCI                                  | 0.06                                              | 0.08                                                    | -0.048                  |
| Previous CABG                                 | 0.05                                              | 0.05                                                    | -0.005                  |
| Previous AMI                                  | 0.11                                              | 0.11                                                    | -0.002                  |
| Previous angina                               | 0.18                                              | 0.19                                                    | -0.029                  |
| Hypertension                                  | 0.44                                              | 0.48                                                    | -0.064                  |
| Hypercholesterolaemia                         | 0.33                                              | 0.37                                                    | -0.075                  |
| Peripheral vascular disease                   | 0.03                                              | 0.02                                                    | 0.098                   |
| Cerebrovascular disease                       | 0.05                                              | 0.04                                                    | 0.019                   |
| COPD                                          | 0.11                                              | 0.11                                                    | 0.019                   |
| Chronic renal failure                         | 0.03                                              | 0.03                                                    | 0.027                   |
| Chronic cardiac failure                       | 0.01                                              | 0.01                                                    | 0.004                   |
| Diabetes                                      | 0.12                                              | 0.12                                                    | -0.015                  |
| Discharge medications                         |                                                   |                                                         |                         |
| Aspirin                                       | 0.88                                              | 0.89                                                    | -0.040                  |
| $\beta$ blockers                              | 0.83                                              | 0.84                                                    | -0.025                  |
| Statin                                        | 0.88                                              | 0.88                                                    | -0.004                  |
| ACEi/ARBs                                     | 0.84                                              | 0.85                                                    | -0.030                  |
| Coronary intervention                         | 0.61                                              | 0.65                                                    | -0.066                  |
| Coronary re-infarction                        | 0.07                                              | 0.03                                                    | 0.057                   |
| Physical activity at 30 days (>150 mins/week) | 0.07                                              | 0.07                                                    | -0.001                  |

Note: EQ-VAS indicates EuroQol Visual Analogue Scale; IMD, Index of Multiple Deprivation; BMI, body mass index; CHD, Coronary heart disease; PCI, percutaneous coronary intervention; CABG, coronary artery bypass graft; AMI, Acute Myocardial Infarction; COPD, chronic obstructive pulmonary disease; ACEi, Angiotensin converting enzyme inhibitor; ARB, Angiotensin receptor blocker.

**eFigure 3:** ROC curve for the propensity scoring model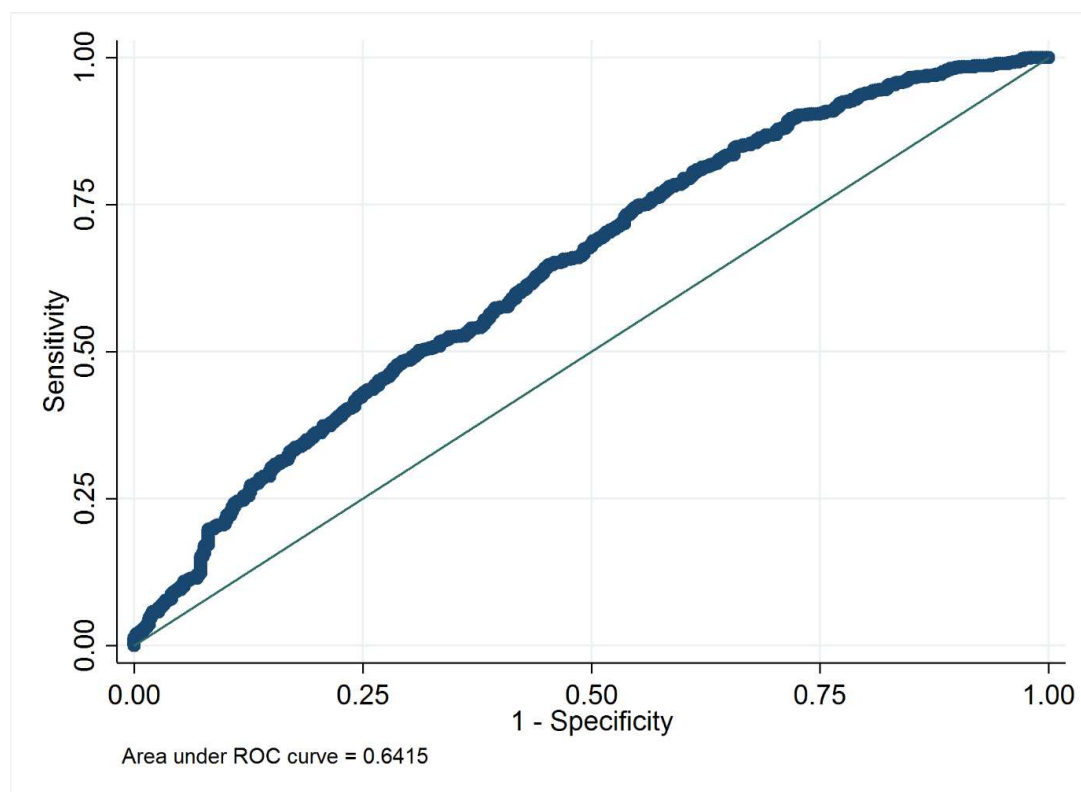

## Section 2

### Multi-level modelling analysis

Multi-level models [2] also known as hierarchical or mixed effects models were used to analyse the longitudinal EQ-VAS scores. Longitudinal data lacks independence because repeated measurements are nested within individuals. Ignoring the clustered nature of the data will result in underestimated standard errors of regression coefficients leading to increased type 1 errors (false positives). In this study we accounted for the clustering in the data by using multi-level models with hospital as the upper level (Level 3), patients as the second level, and repeated measurements within an individual person as the first level. Patients with less than 4 assessments were included in the analysis because multi-level models can accommodate data in which the number of timing observations vary among patients. In this study, 2032 patients had all 4 measures, 1000 had three measures, 674 had two measures, 811 had one measure, and 53 had no measures.

We adopted the approach recommended by Singer et al [3] for fitting multilevel models and considered the following three models. Model 1 was the null model partitioning between individual and within individual variation, model 2 was a random intercepts model allowing each individual to have its own intercept (initial value) but same slope (rate of change) and model 3 was a random intercept and random slope model (allowing individual initial scores and individual rate of change to vary around the mean trajectory). The most appropriate model between a random intercept and random slopes model was selected using the likelihood ratio test. Quantile-quantile plots of residuals were used to test the normality assumption for the multilevel models that were fitted, there is slight violation of the normality assumption at the tails possibly where data maybe scarce (eFigure 4).

**eFigure 4.** Quantile-quantile plot of residuals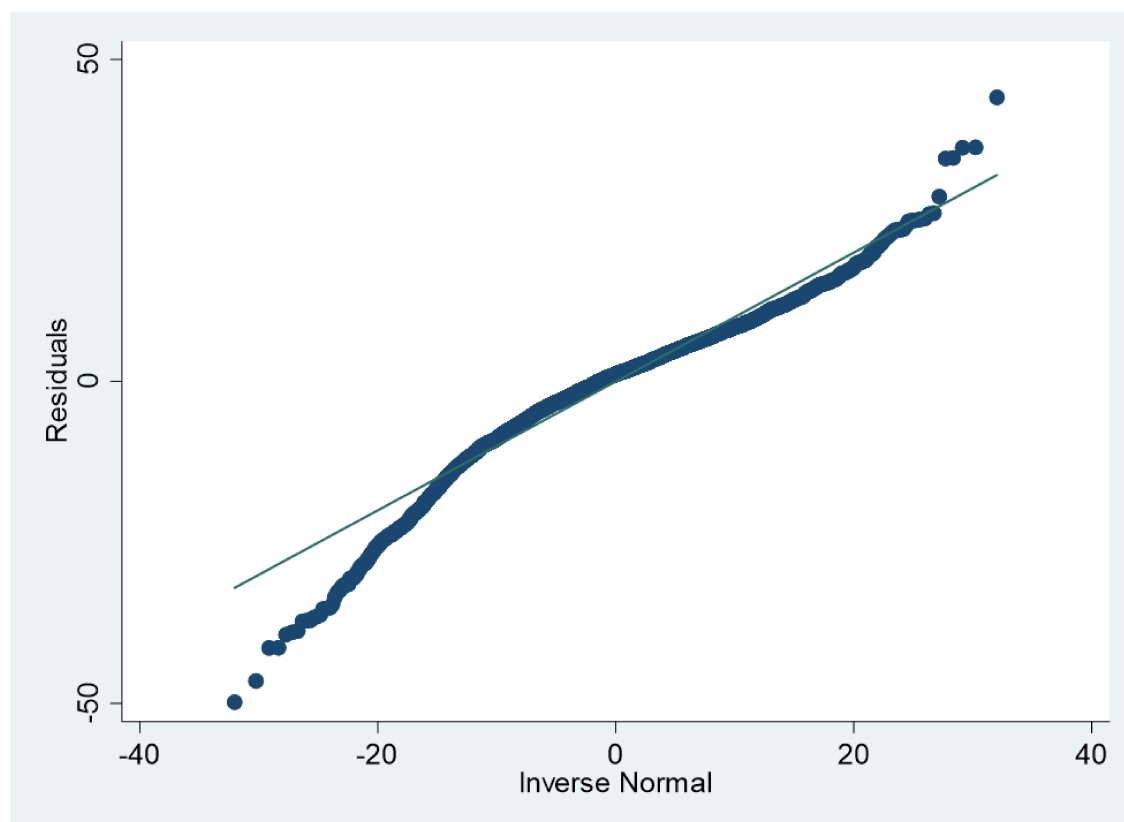

## Missingness analyses

### *Baseline characteristics*

Missing data were imputed using multiple imputations by chained equations.[4] Ten imputed datasets were derived from 20 iterations. Data were imputed for missing baseline characteristics and not follow-up outcome data. A default imputation (missing data default imputed to “NO”) strategy based on clinical expert opinion was implemented for cardiovascular history, cardiovascular risk factors, and categorical treatment variables. The imputation strategy applied is summarised in eTable 2.

**eTable 2:** Imputation Strategy

| Variable                    | Variable Type | Missing (%) | Imputation method                        |
|-----------------------------|---------------|-------------|------------------------------------------|
| Age                         | Continuous    | 17 (0.4)    | Predictive mean matching                 |
| Deprivation (IMD score)     | Continuous    | 264 (5.8)   | Predictive mean matching                 |
| BMI                         | Continuous    | 1794 (39.3) | Predictive mean matching                 |
| Smoker ever                 | Binary        | 143 (3.1)   | Predictor/ Auxiliary and Default imputed |
| Ethnicity (white vs. other) | Binary        | 1004 (22.0) | Predictor/ Auxiliary /Partially Observed |
| Final diagnosis             | Binary        | 0 (0)       | Predictor/ Auxiliary                     |
| Family history of CHD       | Binary        | 599 (13.1)  | Predictor/ Auxiliary and Default imputed |
| Previous PCI                | Binary        | 170 (3.7)   | Predictor/ Auxiliary and Default imputed |
| Previous CABG               | Binary        | 168 (3.7)   | Predictor/ Auxiliary and Default imputed |
| Previous AMI                | Binary        | 169 (3.7)   | Predictor/ Auxiliary and Default imputed |

|                                            |             |            |                                          |
|--------------------------------------------|-------------|------------|------------------------------------------|
| Previous angina                            | Binary      | 169 (3.7)  | Predictor/ Auxiliary and Default imputed |
| Hypertension                               | Binary      | 178 (3.9)  | Predictor/ Auxiliary and Default imputed |
| Hypercholesterolaemia                      | Binary      | 216 (4.7)  | Predictor/ Auxiliary and Default imputed |
| Peripheral vascular disease                | Binary      | 302 (6.6)  | Predictor/ Auxiliary and Default imputed |
| Cerebrovascular disease                    | Binary      | 180 (3.9)  | Predictor/ Auxiliary and Default imputed |
| COPD                                       | Binary      | 188 (4.1)  | Predictor/ Auxiliary and Default imputed |
| Chronic renal failure                      | Binary      | 180 (3.9)  | Predictor/ Auxiliary and Default imputed |
| Chronic cardiac failure                    | Binary      | 177 (3.9)  | Predictor/ Auxiliary and Default imputed |
| Diabetes                                   | Binary      | 93 (2.0)   | Predictor/ Auxiliary and Default imputed |
| Aspirin                                    | Categorical | 142 (3.1)  | Predictor/ Auxiliary and Default imputed |
| $\beta$ blockers                           | Categorical | 144 (3.2)  | Predictor/ Auxiliary and Default imputed |
| Statin                                     | Categorical | 141 (3.1)  | Predictor/ Auxiliary and Default imputed |
| ACEi/ARBs                                  | Categorical | 161 (3.5)  | Predictor/ Auxiliary and Default imputed |
| Coronary intervention                      | Categorical | 735 (16.1) | Predictor/ Auxiliary and Default imputed |
| Re-infarction in hospital                  | Binary      | 151 (3.3)  | Predictor/ Auxiliary and Default imputed |
| EQ-5D Baseline                             | Continuous  | 226 (5.0)  | Predictor/ Auxiliary /Partially Observed |
| EQ-VAS Baseline                            | Continuous  | 193 (4.2)  | Predictor/ Auxiliary /Partially Observed |
| Cardiac rehabilitation offered at baseline | Categorical | 264 (5.8)  | Predictor/ Auxiliary and Default imputed |

**Abbreviation** : IMD indicates Index of Multiple Deprivation; BMI, body mass index; CHD, Coronary heart disease; PCI, percutaneous coronary intervention; CABG, coronary artery bypass graft; AMI, Acute Myocardial Infarction; COPD, chronic obstructive pulmonary disease; ACEi, Angiotensin converting enzyme inhibitor; ARB, Angiotensin receptor blocker; EQ-5D, EuroQol 5-dimension; EQ-VAS, EuroQol Visual Analogue scale.

*Follow-up data*

Baseline patient characteristics were different between responders and non-responders at 12 months. Participants were classed as responders if they returned a questionnaire with a completed EQ-VAS at 30 days, 6 months or 12 months. eTable 3 provides the full details of these differences including; baseline EQ-VAS, demographics, smoking status, co-morbidities, discharge medications and re-infarction in hospital.

**eTable 3:** Comparison of baseline characteristics between responders and non-responders at 12 months. Participants were classed as responders if they returned a questionnaire with a completed EQ-VAS at 30 days, 6 months or 12 months.

| Variable                         | Responders<br>n=2828<br>(61.9%) | Non-Responders<br>n=1742 (38.1%) | P value | Difference<br>(95% CI)    |
|----------------------------------|---------------------------------|----------------------------------|---------|---------------------------|
| <b>Demographics</b>              |                                 |                                  |         |                           |
| Age, mean (SD)                   | 65.5 (10.8)                     | 60.6 (12.9)                      | <0.001  | -4.988 (-5.687 to -4.290) |
| Women, n (%)                     | 715 (25.4)                      | 437 (25.1)                       | 0.858   | -0.002 (-0.028 to 0.024)  |
| Ethnicity (white), n (%)         | 2198 (98.6)                     | 1288 (96.4)                      | <0.001  | -0.022 (-0.033 to -0.010) |
| IMD score, median (IQR)          | 16.9 (10.4-28.9)                | 21.8 (12.8-35.7)                 | <0.001  | 3.763 (2.910 to 4.613)    |
| BMI, median (IQR)                | 27.6 (25.0-30.9)                | 28.4 (25.2-32.3)                 | <0.001  | 0.746 (0.372 to 1.116)    |
| Ex/current smoking status, n (%) | 1744 (63.8)                     | 1268 (74.9)                      | <0.001  | 0.112 (0.084 to 0.139)    |
| STEMI, n (%)                     | 1121 (39.6)                     | 735 (42.2)                       | 0.088   | 0.026 (-0.004 to 0.055)   |
| Family history of CHD, n (%)     | 1005 (37.4)                     | 689 (41.2)                       | 0.019   | 0.038 (0.006 to 0.069)    |
| <b>Comorbidities</b>             |                                 |                                  |         |                           |
| Previous PCI, n (%)              | 197 (7.3)                       | 116 (6.9)                        | 0.623   | -0.004 (-0.019 to 0.012)  |
| Previous CABG, n (%)             | 193 (7.1)                       | 97 (5.7)                         | 0.075   | -0.014 (-0.028 to 0.001)  |
| Previous AMI, n (%)              | 374 (13.7)                      | 259 (15.3)                       | 0.145   | 0.016 (-0.006 to 0.0374)  |
| Previous angina, n (%)           | 549 (20.1)                      | 347 (20.5)                       | 0.749   | 0.004 (-0.021 to 0.029)   |
| Chronic renal failure, n (%)     | 68 (2.5)                        | 55 (3.3)                         | 0.139   | 0.008 (-0.003 to 0.018)   |

|                                    |             |             |        |                           |
|------------------------------------|-------------|-------------|--------|---------------------------|
| Hypertension, n (%)                | 1225 (44.9) | 725 (42.8)  | 0.201  | -0.020 (-0.050 to 0.010)  |
| Chronic heart failure, n (%)       | 38 (1.4)    | 40 (2.4)    | 0.018  | 0.010 (0.001 to 0.018)    |
| Hypercholesterolemia, n (%)        | 881 (32.4)  | 515 (30.4)  | 0.216  | -0.018 (-0.046 to 0.010)  |
| Peripheral vascular disease, n (%) | 88 (3.2)    | 64 (3.8)    | 0.371  | 0.005 (-0.006 to 0.017)   |
| Asthma / COPD, n (%)               | 328 (12.0)  | 226 (13.4)  | 0.195  | 0.013 (-0.007 to 0.034)   |
| Cerebrovascular disease, n (%)     | 107 (3.9)   | 79 (4.7)    | 0.238  | 0.007 (-0.005 to 0.020)   |
| Diabetes mellitus, n (%)           | 407 (14.7)  | 319 (18.6)  | <0.001 | 0.039 (0.016 to 0.061)    |
| <b>Treatments</b>                  |             |             |        |                           |
| PCI this admission, n (%)          | 1119 (44.6) | 704 (44.8)  | 0.549  | -0.010 (-0.042 to 0.022)  |
| CABG this admission, n (%)         | 209 (8.3)   | 123 (7.8)   | 0.420  | -0.008 (-0.026 to 0.011)  |
| <b>Discharge medications</b>       |             |             |        |                           |
| Aspirin, n (%)                     | 2438 (86.3) | 1510 (86.8) | 0.819  | 0.002 (-0.017 to 0.021)   |
| Beta blocker, n (%)                | 2295 (81.2) | 1386 (79.7) | 0.106  | -0.019 (-0.042 to 0.004)  |
| Statins, n (%)                     | 2440 (86.4) | 1519 (87.3) | 0.455  | 0.007 (-0.011 to 0.026)   |
| ACEi, n (%)                        | 2296 (81.7) | 1423 (82.0) | 0.942  | 0.001 (-0.021 to 0.023)   |
| <b>Adverse cardiac events</b>      |             |             |        |                           |
| Re-infarction in hospital, n (%)   | 12 (0.4)    | 18 (1.1)    | 0.013  | 0.006 (0.001 to 0.012)    |
| <b>HRQoL</b>                       |             |             |        |                           |
| Baseline EQ-VAS mean (SD)          | 64.9 (19.7) | 63.2 (20.3) | 0.005  | -1.751 (-2.971 to -0.531) |

Note: IMD indicates Index of Multiple Deprivation; BMI, body mass index; CHD, Coronary heart disease; PCI, percutaneous coronary intervention; CABG, coronary artery bypass graft; AMI, Acute Myocardial Infarction; COPD, chronic obstructive pulmonary disease; STEMI, ST-elevation myocardial infarction; NSTEMI, non ST-elevation myocardial infarction; ACEi, angiotensin converting enzyme inhibitor; HRQoL, Health-related quality of life.

**eTable 4** EQ-5D-3L domain responses for patients with AMI at hospitalization, 30 days, 6 months and 12 months

|                                            | <b>Baseline n (%)</b> | <b>30 days n (%)</b> | <b>6 months n (%)</b> | <b>12 months n (%)</b> |
|--------------------------------------------|-----------------------|----------------------|-----------------------|------------------------|
| <b>EQ-5D Mobility, n (%)</b>               | <b>n=4400</b>         | <b>n=3387</b>        | <b>n=2965</b>         | <b>n=2822</b>          |
| No problem                                 | 2840 (64.6)           | 2240 (66.1)          | 1962 (66.2)           | 1823 (64.6)            |
| Some problem                               | 1390 (30.4)           | 1144 (33.8)          | 1000 (33.7)           | 993 (21.7)             |
| Severe problem                             | 170 (3.72)            | 3 (0.1)              | 3 (0.1)               | 6 (0.1)                |
| Missing                                    | 170 (3.7)             | 1183 (25.9)          | 1605 (35.1)           | 1748 (38.3)            |
| <b>EQ-5D Self-care, n (%)</b>              | <b>n=4388</b>         | <b>n=3382</b>        | <b>n=2961</b>         | <b>n=2820</b>          |
| No problem                                 | 3786 (86.3)           | 2976 (88.0)          | 2608 (88.1)           | 2445 (86.7)            |
| Some problem                               | 560 (12.8)            | 398 (8.7)            | 347 (7.6)             | 369 (8.0)              |
| Severe problem                             | 42 (1.0)              | 8 (0.2)              | 6 (0.2)               | 6 (0.1)                |
| Missing                                    | 182 (4.0)             | 1188 (26.0)          | 1609 (35.2)           | 1750 (38.3)            |
| <b>EQ-5D Usual activities, n (%)</b>       | <b>n=4376</b>         | <b>n=3373</b>        | <b>n=2964</b>         | <b>n=2823</b>          |
| No problem                                 | 2283 (50.0)           | 1557 (34.1)          | 1809 (61.0)           | 1773 (38.8)            |
| Some problem                               | 1476 (32.3)           | 1556 (34.1)          | 1032 (22.6)           | 946 (20.7)             |
| Severe problem                             | 617 (13.5)            | 260 (5.7)            | 123 (2.7)             | 104 (2.3)              |
| Missing                                    | 194 (4.3)             | 1197 (26.2)          | 1606 (35.1)           | 1747(38.2)             |
| <b>EQ-5D Pain, n (%)</b>                   | <b>n=4393</b>         | <b>n=3376</b>        | <b>n=2962</b>         | <b>n=2805</b>          |
| No problem                                 | 2889 (63.2)           | 1922 (42.1)          | 1760 (38.5)           | 1705 (37.3)            |
| Some problem                               | 1362 (29.8)           | 1324 (29.0)          | 1069 (23.4)           | 977 (21.4)             |
| Severe problem                             | 142 (3.1)             | 130 (2.8)            | 133 (2.9)             | 123 (2.7)              |
| Missing                                    | 177 (3.9)             | 1194 (26.1)          | 1608 (35.2)           | 1765 (38.6)            |
| <b>EQ-5D Anxiety and depression, n (%)</b> | <b>n=4392</b>         | <b>n=3382</b>        | <b>n=2959</b>         | <b>n=2819</b>          |
| No problem                                 | 3014 (66.0)           | 2164 (47.4)          | 2080 (45.5)           | 2056 (45.0)            |
| Some problem                               | 1281 (28.0)           | 1137 (24.9)          | 800 (17.5)            | 694 (15.2)             |
| Severe problem                             | 97 (2.1)              | 81 (1.8)             | 79 (1.7)              | 69 (1.5)               |
| Missing                                    | 178 (3.9)             | 1188 (26.0)          | 1611 (35.3)           | 1751 (38.3)            |

Note: EQ-5D indicates EuroQol-5 Dimension-3 Level (EQ-5D-3L)

**eTable 5:** Mean EQ-5D-3L and EQ-VAS scores at baseline, 30 days, 6 months and 12 months stratified by type of acute myocardial infarction (STEMI vs. NSTEMI)

| Variable                          | STEMI<br>n=1856 | NSTEMI<br>n=2714 | P value | All AMI<br>n=4570 | Missing, n (%) |
|-----------------------------------|-----------------|------------------|---------|-------------------|----------------|
| <b>EQ-5D index, mean (SD)</b>     |                 |                  |         |                   |                |
| Baseline, mean (SD)               | 0.755 (0.28)    | 0.737 (0.28)     | 0.043   | 0.740 (0.28)      | 226 (5.0)      |
| 30 days, mean (SD)                | 0.776 (0.24)    | 0.745 (0.25)     | <0.001  | 0.757 (0.25)      | 1244 (27.2)    |
| 6 months, mean (SD)               | 0.809 (0.26)    | 0.777 (0.26)     | <0.001  | 0.790 (0.26)      | 1640 (35.9)    |
| 12 months, mean (SD)              | 0.820 (0.25)    | 0.777 (0.27)     | <0.001  | 0.794 (0.26)      | 1787 (39.1)    |
| <b>EQ-5D VAS score, mean (SD)</b> |                 |                  |         |                   |                |
| Baseline, mean (SD)               | 65.0 (19.8)     | 63.8 (20.0)      | 0.051   | 64.3 (19.9)       | 193 (4.2)      |
| 30 days, mean (SD)                | 71.2 (18.0)     | 69.6 (17.7)      | 0.010   | 70.2 (17.8)       | 1269 (27.8)    |
| 6 months, mean (SD)               | 75.3 (17.4)     | 72.9 (17.9)      | <0.001  | 73.9 (17.7)       | 1691 (37.0)    |
| 12 months, mean (SD)              | 76.5 (17.6)     | 73.1 (18.9)      | <0.001  | 74.4 (18.5)       | 1840 (40.3)    |

Note: EQ-5D indicates EuroQol-5 Dimension-3 Level (EQ-5D-3L)

**eTable 6:** HRQoL utilities dependent on attendance of cardiac rehabilitation and self-reported physical activity.

|                                                | <b>Baseline</b> | <b>30 days<br/>(95% CI)</b> | <b>6 months<br/>(95% CI)</b> | <b>12 months<br/>(95% CI)</b> |
|------------------------------------------------|-----------------|-----------------------------|------------------------------|-------------------------------|
| <b>Cardiac rehabilitation (yes)</b>            |                 |                             |                              |                               |
| <i>Utilities</i>                               |                 |                             |                              |                               |
| EQ-VAS, mean (SD)                              | 65.4 (19.6)     | 71.0 (16.8)                 | 76.0 (16.4)                  | 76.9 (16.8)                   |
| EQ5D, mean (SD)                                | 0.766 (0.264)   | 0.773 (0.232)               | 0.821 (0.236)                | 0.832 (0.225)                 |
| <i>physical activity intensity</i>             |                 |                             |                              |                               |
| EQ-VAS if CR and $\geq 150$ mins, mean (SD)    | 71.0 (18.8)     | 79.3 (14.6)                 | 82.2 (13.9)                  | 84.1 (12.1)                   |
| EQ-VAS if CR and $< 150$ mins, mean (SD)       | 63.9 (19.8)     | 70.2 (17.0)                 | 74.9 (16.7)                  | 75.6 (17.0)                   |
| EQ5D if CR and $\geq 150$ mins, mean (SD)      | 0.830 (0.251)   | 0.859 (0.194)               | 0.888 (0.176)                | 0.913 (0.156)                 |
| EQ5D if CR and $< 150$ mins, mean (SD)         | 0.752 (0.266)   | 0.765 (0.236)               | 0.808 (0.245)                | 0.820 (0.229)                 |
| <b>Cardiac rehabilitation (No)</b>             |                 |                             |                              |                               |
| <i>Utilities</i>                               |                 |                             |                              |                               |
| EQ-VAS, mean (SD)                              | 64.5 (20.0)     | 68.6 (19.8)                 | 70.2 (19.0)                  | 70.4 (20.4)                   |
| EQ5D, mean (SD)                                | 0.754 (0.277)   | 0.728 (0.278)               | 0.737 (0.290)                | 0.739 (0.294)                 |
| <i>physical activity intensity</i>             |                 |                             |                              |                               |
| EQ-VAS if no CR and $\geq 150$ mins, mean (SD) | 67.4 (20.5)     | 77.0 (15.8)                 | 80.5 (15.0)                  | 81.6 (17.2)                   |
| EQ-VAS if no CR and $< 150$ mins, mean (SD)    | 63.4 (19.7)     | 67.7 (20.0)                 | 68.9 (19.1)                  | 69.2 (20.6)                   |
| EQ5D if no CR and $\geq 150$ mins, mean (SD)   | 0.804 (0.267)   | 0.868 (0.150)               | 0.829 (0.238)                | 0.875 (0.191)                 |
| EQ5D if no CR and $< 150$ mins, mean (SD)      | 0.736 (0.285)   | 0.716 (0.287)               | 0.731 (0.290)                | 0.719 (0.303)                 |
| <b>All patients</b>                            |                 |                             |                              |                               |
| EQ-VAS, mean (SD)                              | 64.3 (19.9)     | 70.2 (17.8)                 | 73.9 (17.7)                  | 74.4 (18.5)                   |
| EQ5D, mean (SD)                                | 0.744 (0.280)   | 0.757 (0.250)               | 0.790 (0.261)                | 0.794 (0.260)                 |
| <i>Physical activity intensity</i>             |                 |                             |                              |                               |
| EQ-VAS if $< 150$ mins, mean (SD)              | 64.4 (19.7)     | 69.3 (18.0)                 | 72.6 (18.1)                  | 73.1 (28.8)                   |
| EQ-VAS if $\geq 150$ mins, mean (SD)           | 68.3 (19.3)     | 78.6 (15.2)                 | 81.9 (14.0)                  | 83.5 (13.6)                   |

|                             |               |               |               |               |
|-----------------------------|---------------|---------------|---------------|---------------|
| EQ5D if <150mins, mean (SD) | 0.748 (0.276) | 0.749 (0.255) | 0.777 (0.267) | 0.778 (0.267) |
| EQ5D if ≥150mins, mean (SD) | 0.811 (0.250) | 0.859 (0.186) | 0.874 (0.193) | 0.903 (0.172) |

Note: EQ-5D indicates EuroQol-5 Dimension-3 Level (EQ-5D-3L)

**eTable 7:** Results from the imputed and propensity score weighted multi-level modelling of association of cardiac rehabilitation on change in EQ-VAS following AMI (regression coefficients, 95% confidence intervals)

| Variable                         | Regression coefficient (95% CI) | P value |
|----------------------------------|---------------------------------|---------|
| <b>Cardiac rehabilitation</b>    |                                 |         |
| Undergone Cardiac Rehabilitation | 2.12 (0.68 to 3.55)             | 0.004   |
| <b>Physical activity</b>         |                                 |         |
| ≥150mins per week                | 4.75 (3.16 to 6.34)             | <0.001  |
| <b>Follow-up time</b>            |                                 |         |
| Ref (30 day)                     |                                 |         |
| 6 months                         | 3.18 (2.22 to 4.14)             | <0.001  |
| 12 months                        | 3.81 (2.72 to 4.90)             | <0.001  |
| <b>Baseline</b>                  |                                 |         |
| Age                              | -0.3 (-0.12 to 0.06)            | 0.513   |
| Men                              | 2.43 (1.10 to 3.76)             | <0.001  |
| IMD score                        | -0.10 (-0.15 to -0.05)          | <0.001  |
| BMI                              | -0.13 (-0.27 to 0.01)           | 0.069   |
| Ex/current smoker                | -1.19 (-2.81 to 0.42)           | 0.147   |
| NSTEMI                           | -0.63 (-2.37 to 1.11)           | 0.478   |
| Family history of CHD            | 0.31 (-0.85 to 1.46)            | 0.604   |
| <b>Co-morbidities</b>            |                                 |         |
| Previous PCI                     | 0.22 (-3.12 to 3.55)            | 0.898   |
| Previous CABG                    | -3.37 (-6.20 to -0.54)          | 0.020   |
| Previous AMI                     | -1.64 (-5.34 to 2.06)           | 0.384   |
| Previous angina                  | -2.37 (-3.97 to -0.76)          | 0.004   |
| Chronic renal failure            | -4.87 (-10.10 to 0.37)          | 0.068   |
| Hypertension                     | 0.18 (-0.84 to 1.21)            | 0.725   |
| Chronic heart failure            | -7.23 (-15.40 to 0.94)          | 0.083   |
| Hypercholesterolemia             | -2.09 (-3.55 to -0.63)          | 0.005   |
| Peripheral vascular disease      | -2.31 (-4.25 to 8.87)           | 0.491   |
| Asthma / COPD                    | -3.09 (-5.23 to -0.96)          | 0.004   |
| Cerebrovascular disease          | 0.67 (-1.95 to 3.30)            | 0.615   |
| Diabetes mellitus                | -0.65 (-2.59 to 1.30)           | 0.516   |
| <b>Treatments</b>                |                                 |         |
| PCI during admission             | 1.22 (0.27 to 2.18)             | 0.012   |
| CABG this admission              | -1.89 (-5.63 to 1.85)           | 0.322   |

|                                           |                                                                             |        |
|-------------------------------------------|-----------------------------------------------------------------------------|--------|
| <b>Discharge medications</b>              |                                                                             |        |
| Aspirin                                   | -6.89 (-18.53 to 4.75)                                                      | 0.246  |
| Beta blocker                              | -1.94 (-7.68 to 3.81)                                                       | 0.509  |
| Statins                                   | 14.93 (1.25 to 28.61)                                                       | 0.032  |
| ACEi                                      | -1.68 (-7.94 to 4.57)                                                       | 0.598  |
| <b>Adverse cardiac events</b>             |                                                                             |        |
| Re-infarction in hospital                 | 0.70 (-5.47 to 6.86)                                                        | 0.825  |
| <b>HRQoL</b>                              |                                                                             |        |
| EQ-5D VAS baseline                        | 0.30 (0.25 to 0.35)                                                         | <0.001 |
| <b>Random effects</b>                     |                                                                             |        |
| Hospital                                  | 4.11 x e <sup>-6</sup> (1.72 x e <sup>-43</sup> to 9.80 x e <sup>31</sup> ) |        |
| Patient                                   | 10.52 (7.34 to 15.07)                                                       |        |
| Residual                                  | 11.08 (10.13 to 12.11)                                                      |        |
| <b>Intraclass correlation coefficient</b> |                                                                             |        |
| <b>(%)</b>                                |                                                                             |        |
| Patient                                   | 48.7                                                                        |        |
| Residual                                  | 51.3                                                                        |        |

*Note: IMD indicates Index of Multiple Deprivation; BMI, body mass index; CHD, Coronary heart disease; PCI, percutaneous coronary intervention; CABG, coronary artery bypass graft; AMI, Acute Myocardial Infarction; COPD, chronic obstructive pulmonary disease; STEMI, ST-elevation myocardial infarction; NSTEMI, non ST-elevation myocardial infarction; ACEi, angiotensin converting enzyme inhibitor; EQ-5D, EuroQol-5 Dimension*

## eReferences

1. Crump RK, Hotz VJ, Imbens GW, Mitnik OA. Dealing with limited overlap in estimation of average treatment effects. *Biometrika* 2009;asn055
2. Goldstein H. *Multilevel statistical models*: John Wiley & Sons, 2011.
3. Singer JM, Andrade DF. Analysis of longitudinal data. *Handbook of statistics* 2000;**18**:115-60
4. Cattle B, Baxter P, Greenwood D, Gale C, West R. Multiple imputation for completion of a national clinical audit dataset. *Stat Med* 2011;**30**(22):2736-53
